# Supplementary material for: CZT-1 Is a Novel Transcription Factor Controlling Cell Death and Natural Drug Resistance in Neurospora crassa
Source: PubMed Central journal article supplement (PMC4065252; doi:10.1534/g3.114.011312), 2014-04-08
Supplement: supp_g3.114.011312_011312SI.pdf [file supp_g3.114.011312_011312SI.pdf]

## **CZT-1 is a novel transcription factor controlling cell death and natural drug resistance in *Neurospora crassa***

A. Pedro Gonçalves \* §, Charles Hall † <sup>1</sup>, David J. Kowbel †, N. Louise Glass †, Arnaldo Videira \* §

\* IBMC - Instituto de Biologia Molecular e Celular - Universidade do Porto, Rua do Campo Alegre 823, 4150-180 Porto, Portugal

§ ICBAS - Instituto de Ciências Biomédicas de Abel Salazar, Universidade do Porto, Rua de Jorge Viterbo Ferreira 228, 4050-313 Porto, Portugal

† Plant and Microbial Biology Department, The University of California, Berkeley, 341 Koshland Hall, 94720, Berkeley, CA, USA

<sup>1</sup> Current address: Dupont Industrial Biosciences, 925 Page Mill Road, 94304, Palo Alto, CA, USA

RNA-sequencing data from this study have been submitted to the NCBI Gene Expression Omnibus (GEO) (<http://www.ncbi.nlm.nih.gov/geo>); series record: GSE52153.

### Corresponding authors:

António Pedro Gonçalves

ICBAS - Instituto de Ciências Biomédicas de Abel Salazar, Universidade do Porto

Genética Molecular - Edifício 1, Piso 5

Rua de Jorge Viterbo Ferreira 228,

4050-313 Porto, Portugal

[apgoncalves@ibmc.up.pt](mailto:apgoncalves@ibmc.up.pt)

Arnaldo Videira

ICBAS - Instituto de Ciências Biomédicas de Abel Salazar, Universidade do Porto

Genética Molecular - Edifício 1, Piso 5

Rua de Jorge Viterbo Ferreira 228,

4050-313 Porto, Portugal

[avideira@ibmc.up.pt](mailto:avideira@ibmc.up.pt)

**DOI: 10.1534/g3.114.011312**

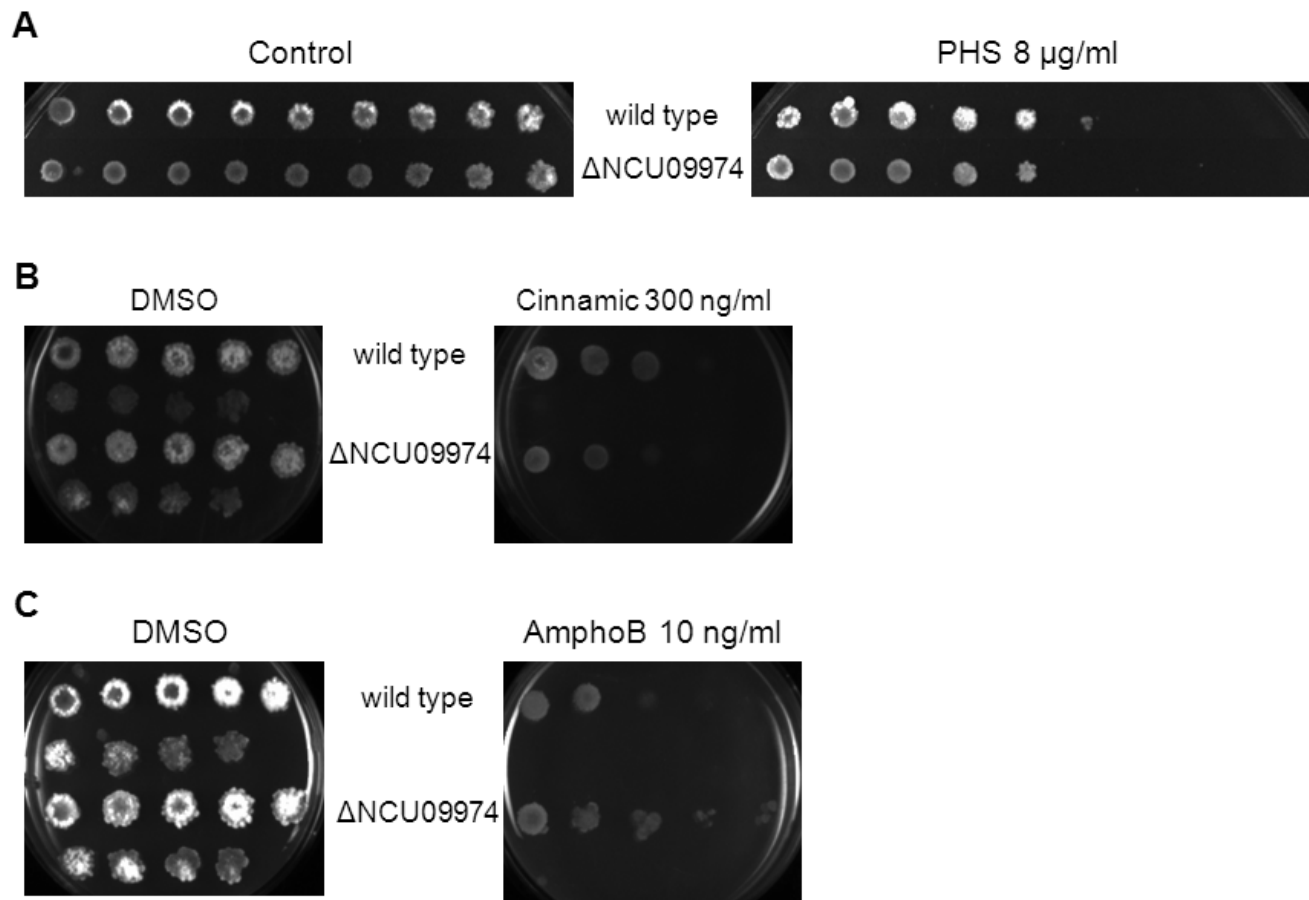

**Figure S1** Sensitivity profile of the wild type and  $\Delta$ NCU09974 strains on GFS medium supplemented with phytosphingosine (PHS) (A), cinnamic acid (B) and amphotericin B (AmphoB) (C).

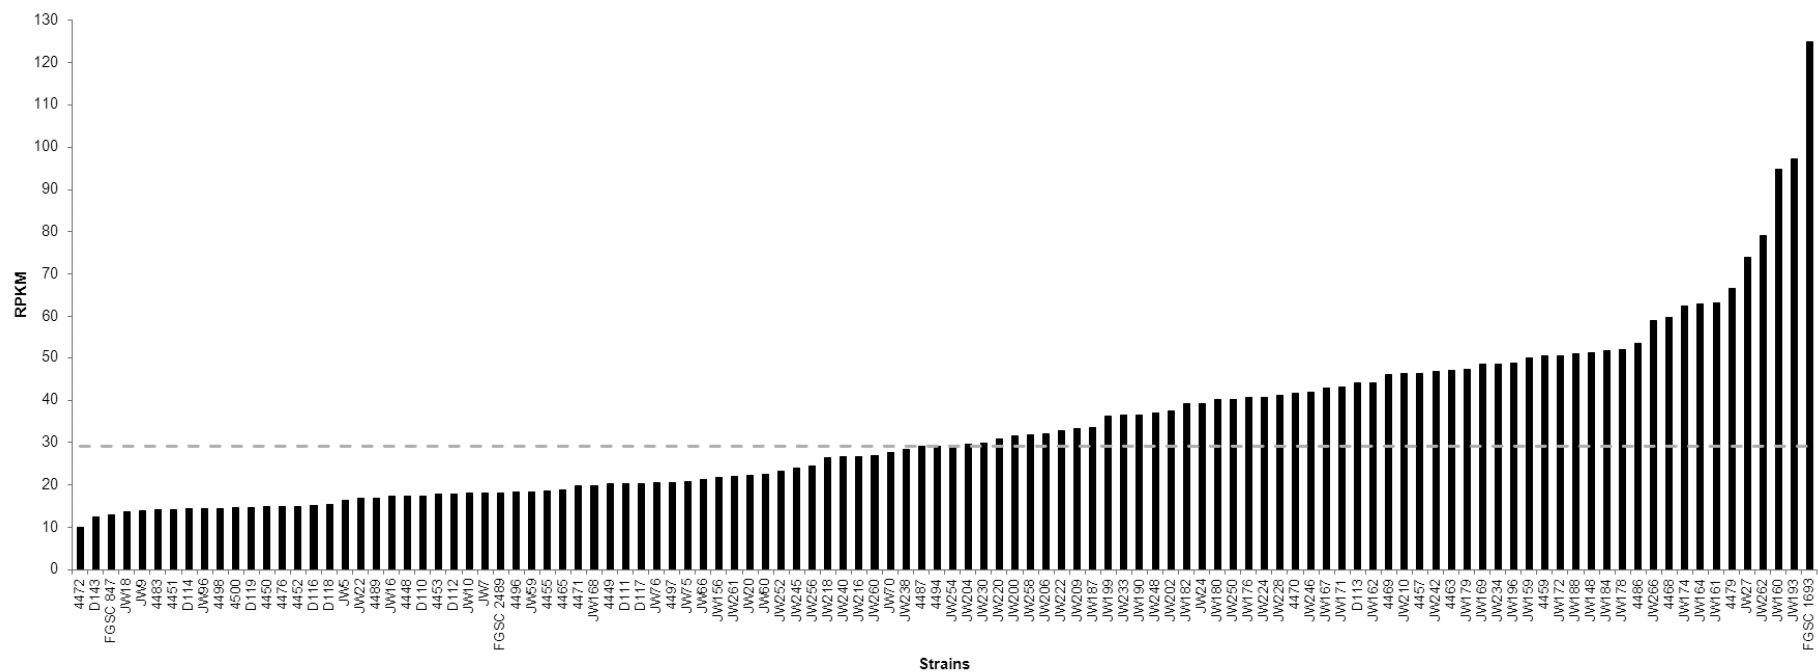

**Figure S2** Expression levels of *czt-1*, expressed as RPKM, in wild strains of *Neurospora* collected in the Louisiana state (USA). The wild type laboratory strain FGSC 2489 is shown for reference. The broken line represents the median RPKM.

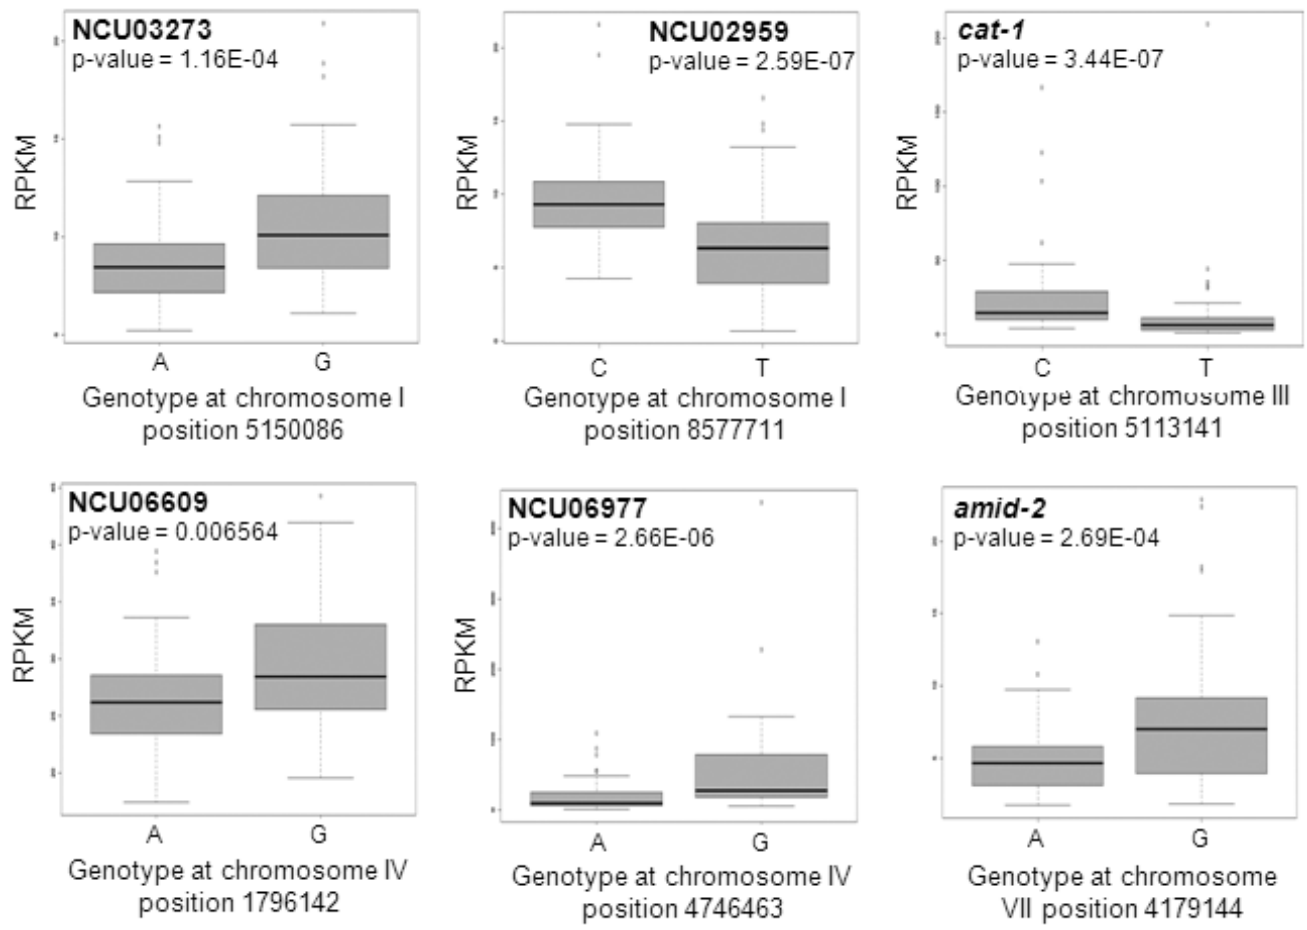

**Figure S3** Box plots showing the relationship between the two found nucleotides for each SNP identified by the GWAS and the expression of the respective gene.

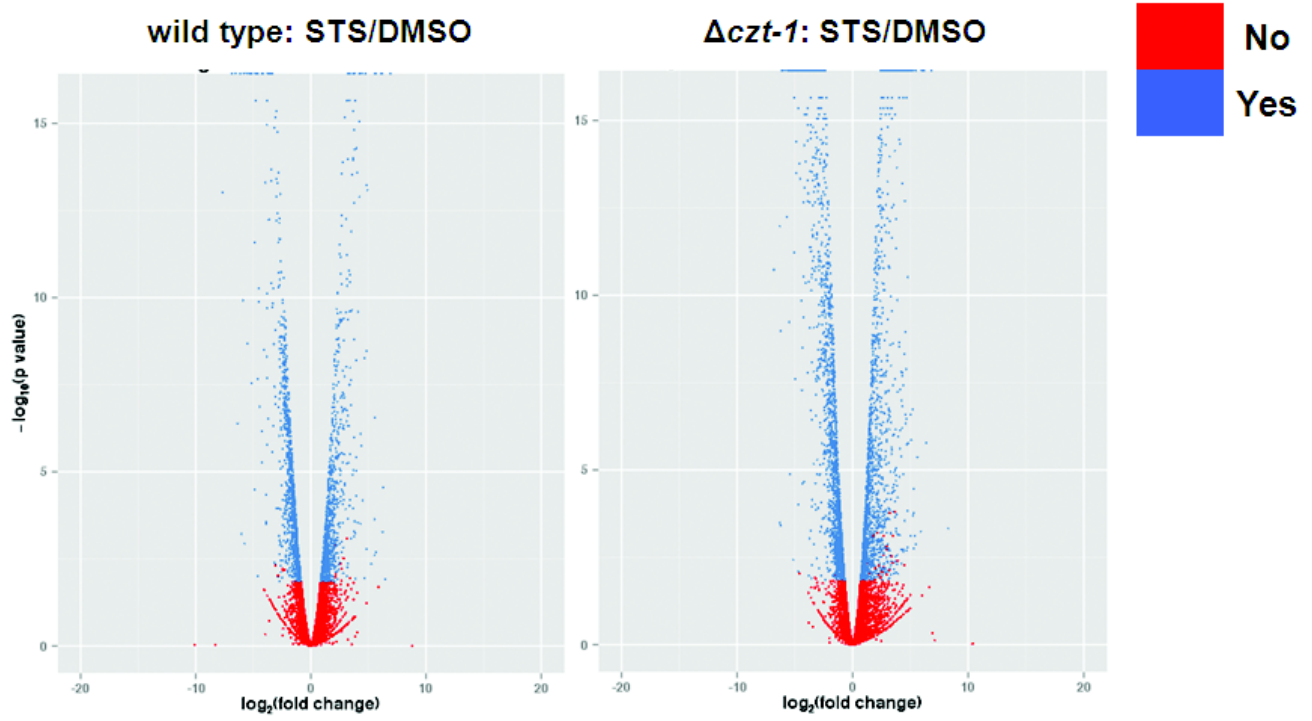

**Figure S4** Volcano plots illustrate the amplification of the response to staurosporine in  $\Delta czt-1$  versus the wild type strain.

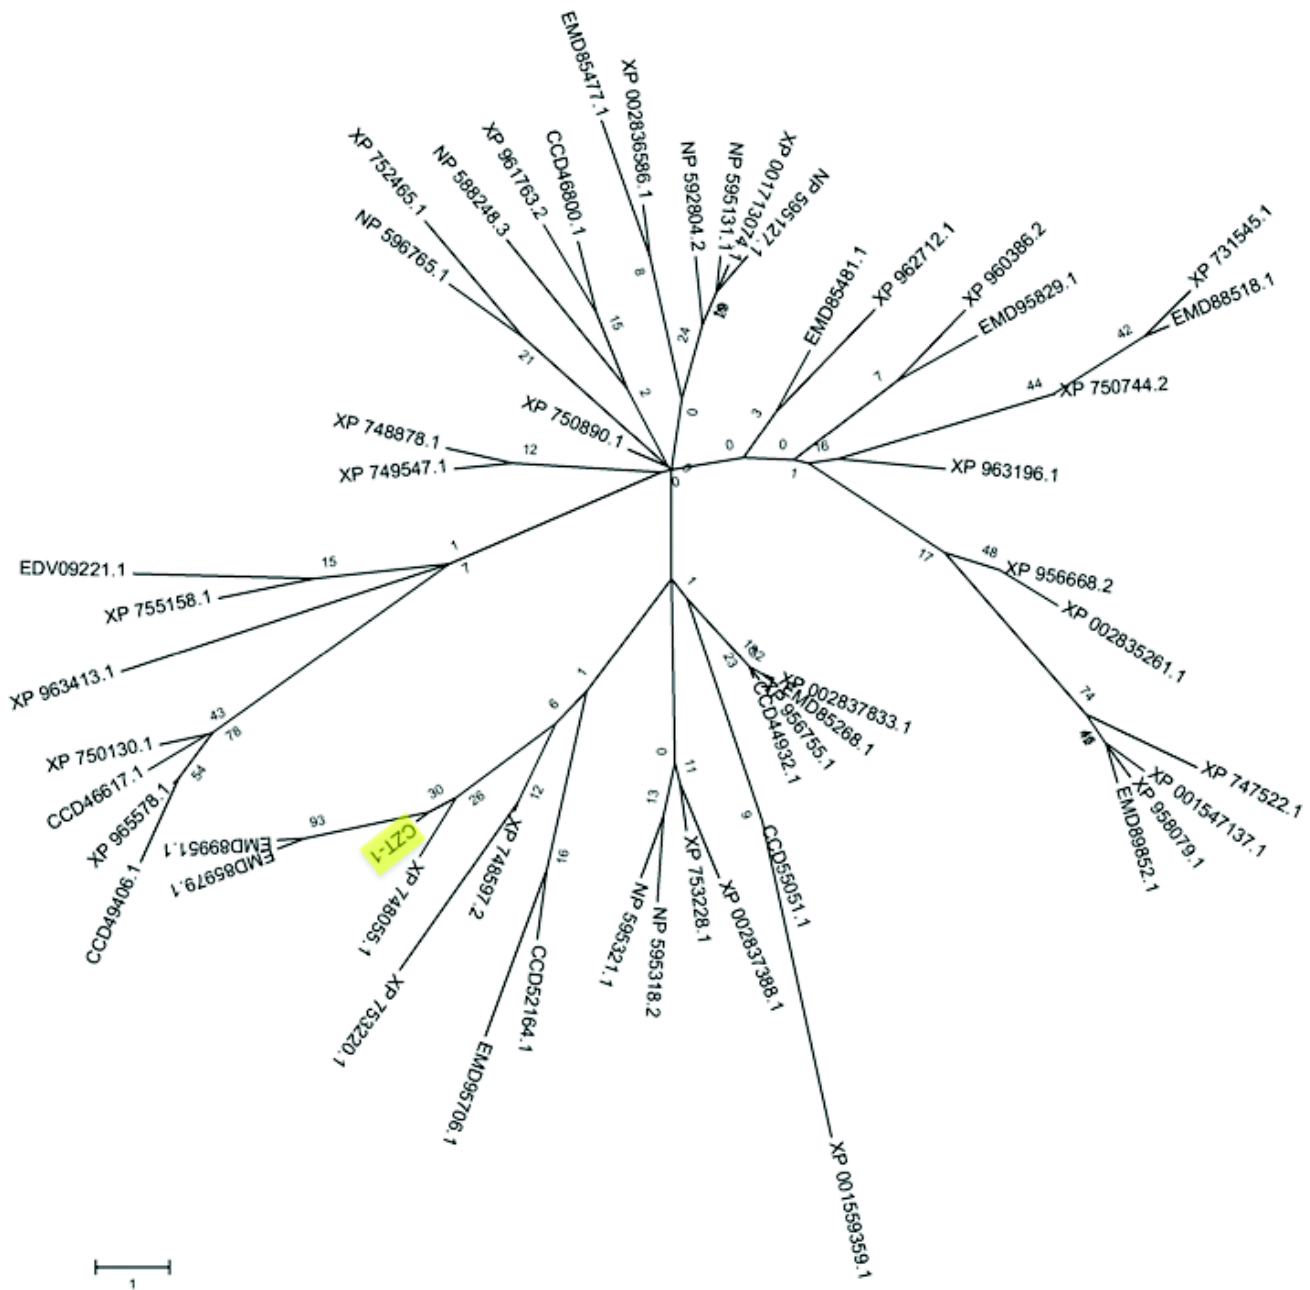

**Figure S5** A maximum likelihood phylogenetic tree was built using the Dayhoff method on a ClustalW2 multiple alignment. The bootstrap test (1000 replications) was applied. Different classes of Ascomycota are represented (one species per class): Sordariomycetes/*Neurospora crassa* (accession numbers: XP\_958092.1/CZT-1, XP\_956755.1, XP\_963196.1, XP\_961763.2, XP\_958079.1, XP\_956668.2, XP\_963413.1, XP\_960386.2, XP\_965578.1, XP\_962712.1), Eurotiomycetes/*Aspergillus fumigatus* (XP\_748055.1, XP\_748597.2, XP\_753220.1, XP\_753228.1, XP\_755158.1, XP\_750744.2, XP\_731545.1, XP\_747522.1, XP\_749547.1, XP\_750130.1, XP\_748878.1, XP\_752465.1, XP\_750890.1), Dothideomycetes/*Bipolaris maydis* (EMD85979.1, EMD89951.1, EMD85481.1, EMD85477.1, EMD85268.1, EMD89852.1, EMD88518.1, EMD95829.1, EMD95706.1), Pezizomycetes/*Tuber melanosporum* (XP\_002837833.1, XP\_002837838.1, XP\_002837838.1, XP\_002837838.1, XP\_002837838.1), Leotiomycetes/*Botrytis cinerea* (CCD52164.1, CCD44932.1, CCD46036.1, CCD55051.1, CCD49406.1, CCD46800.1, CCD43955.1, CCD46617.1), Saccharomycetes/*Saccharomyces cerevisiae* (EDV09221.1) and Schizosaccharomycetes/*Schizosaccharomyces pombe* (XP\_001713074.1, NP\_592804.2, NP\_595127.1, NP\_596765.1, NP\_588248.3, NP\_595318.2, NP\_595131.1, NP\_595321.1). CZT-1 is highlighted by a yellow-shaded box.

## Files S1-S7

Available for download as Excel files at <http://www.g3journal.org/lookup/suppl/doi:10.1534/g3.114.011312/-/DC1>

**File S1** Complete RNA-seq dataset.

**File S2** Complete functional enrichment analysis, using FunCat, of genes whose expression was altered by staurosporine in wild type cells and genes whose expression is basally affected by deletion of *czt-1*.

**File S3** Complete functional enrichment analysis, using FunCat, of genes whose expression was specifically induced or repressed only in wild type, only in  $\Delta czt-1$  or in both strains.

**File S4** Blast2GO analysis of functional enrichment of staurosporine-induced or -repressed genes using  $\Delta czt-1$ -treated cells as the test set and wild type-treated cells as the reference set.

**File S5** Expression levels comparison between wild type and  $\Delta czt-1$  cells for genes encoding ABC transporters.

**File S6** Expression levels comparison between wild type and  $\Delta czt-1$  cells for genes involved in oxidative stress.

**File S7** Expression levels comparison between wild type and  $\Delta czt-1$  cells for genes involved in  $\text{Ca}^{2+}$  handling.
