# Supplementary material for: CZT-1 Is a Novel Transcription Factor Controlling Cell Death and Natural Drug Resistance in Neurospora crassa
Source: PubMed Central journal article supplement (PMC4065252; doi:10.1534/g3.114.011312), 2014-04-08
Supplement: supp_g3.114.011312_FigureS3.pdf [file supp_g3.114.011312_FigureS3.pdf]

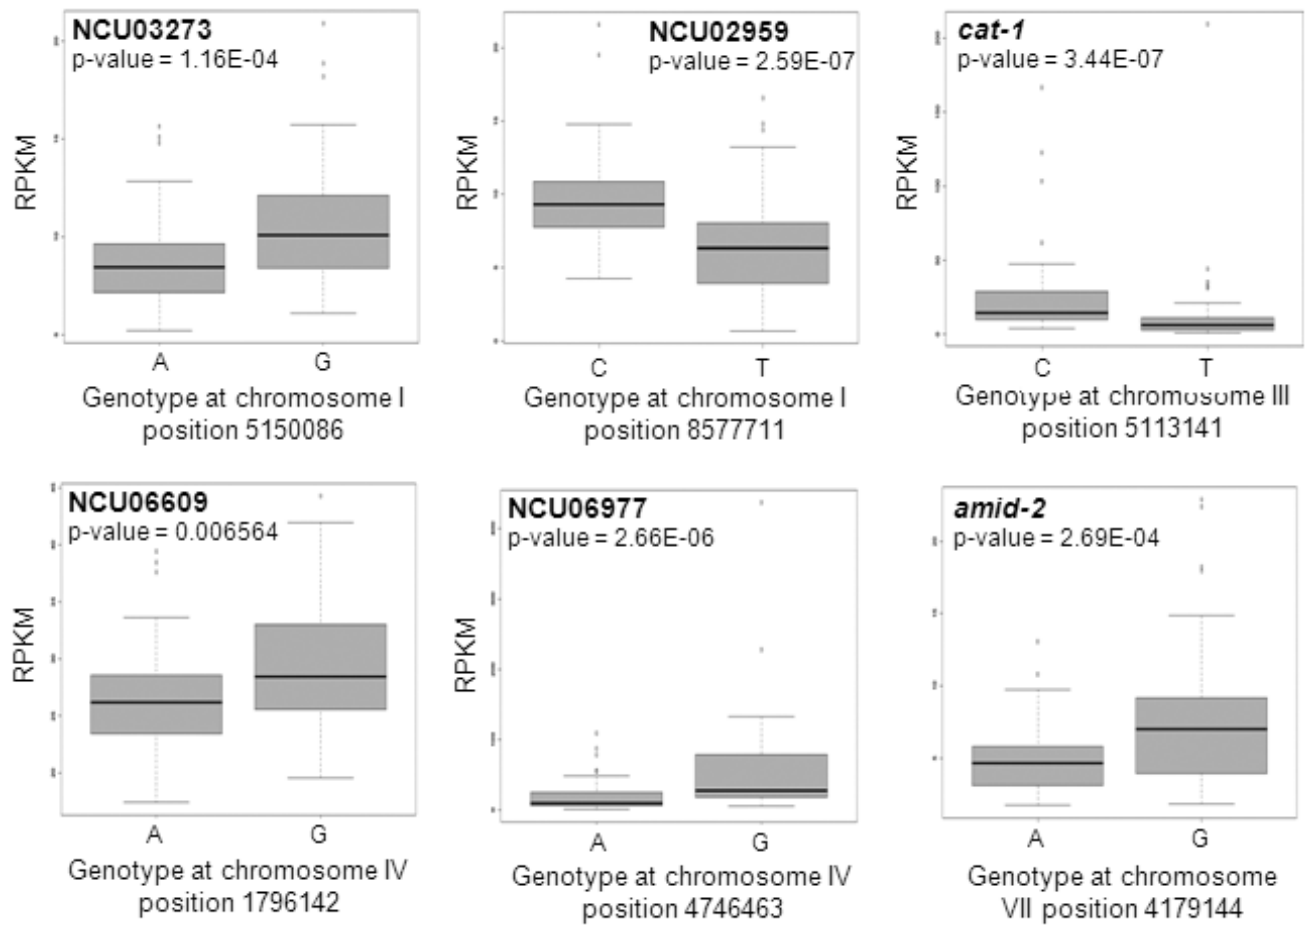

**Figure S3** Box plots showing the relationship between the two found nucleotides for each SNP identified by the GWAS and the expression of the respective gene.
