# Supplementary material for: CZT-1 Is a Novel Transcription Factor Controlling Cell Death and Natural Drug Resistance in Neurospora crassa
Source: PubMed Central journal article supplement (PMC4065252; doi:10.1534/g3.114.011312), 2014-04-08
Supplement: supp_g3.114.011312_FigureS4.pdf [file supp_g3.114.011312_FigureS4.pdf]

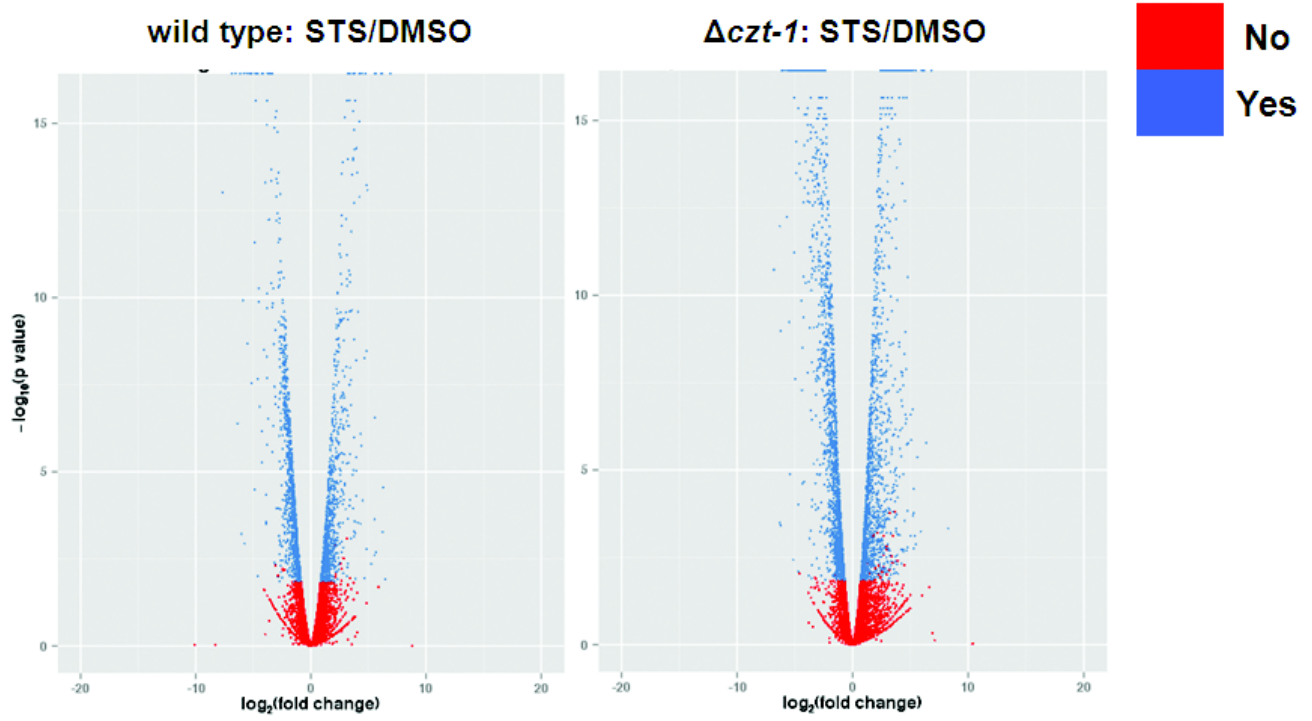

**Figure S4** Volcano plots illustrate the amplification of the response to staurosporine in  $\Delta czt-1$  versus the wild type strain.
